# Supplementary material for: Modelling ligand selectivity of serine proteases using integrative proteochemometric approaches improves model performance and allows the multi-target dependent interpretation of features
Source: Royal Society of Chemistry journal article supplement (doi:10.1039/c4ib00175c), 2014-01-01
Supplement: c4ib00175c2.pdf [file c4ib00175c2.pdf]

### Supplementary Information

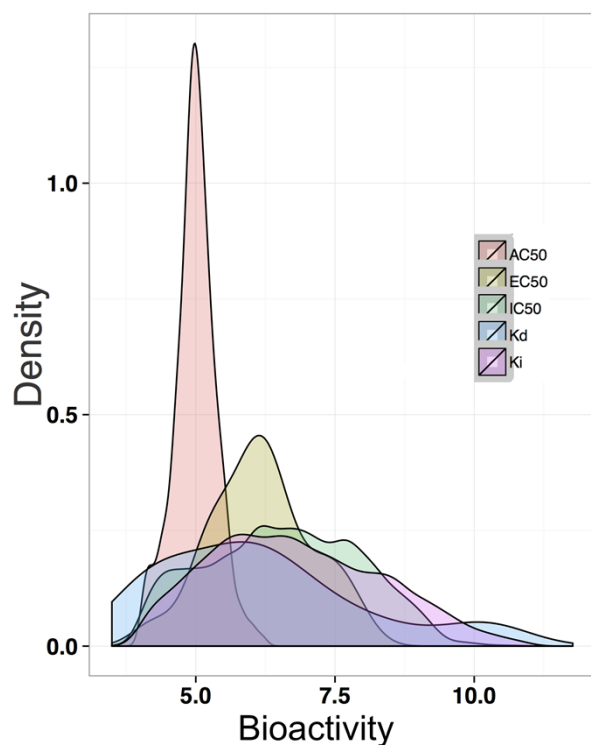

**Supplementary Figure SF 1: Distribution of activity values in the serine protease dataset.** A normal distribution is found for Ki and IC50 affinity values. The other three activity measures have less data points in the complete set and a narrow peak is observed.

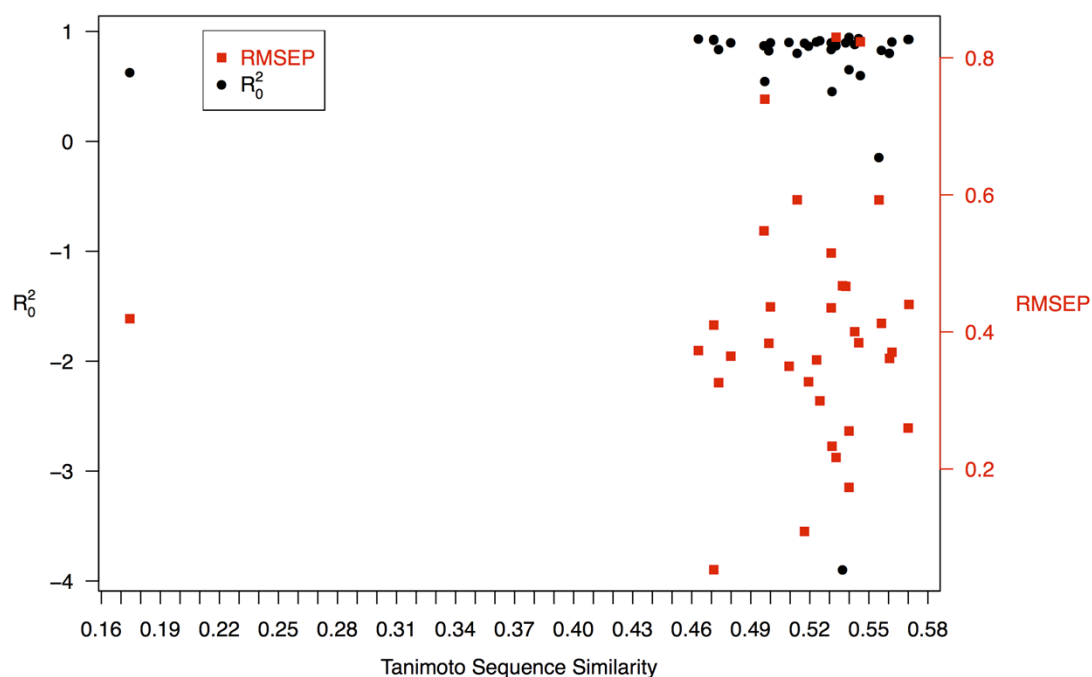

### Supplementary Figure SF 2: Applicability domain of target space of PCM

**model.** All 67 targets are equally similar exhibiting an average similarity of 46%.

Likely for this reason, we do not see an improvement of predictive correlation ( $R^2$ ) or decrease in predicted error (RMSE) with increase in target Tanimoto similarity. Only two most diverse targets (C1r\_human and FA10\_dog) were observed to have a poor prediction ( $R^2 < 0$ ;  $RMSE > 0.5$ )

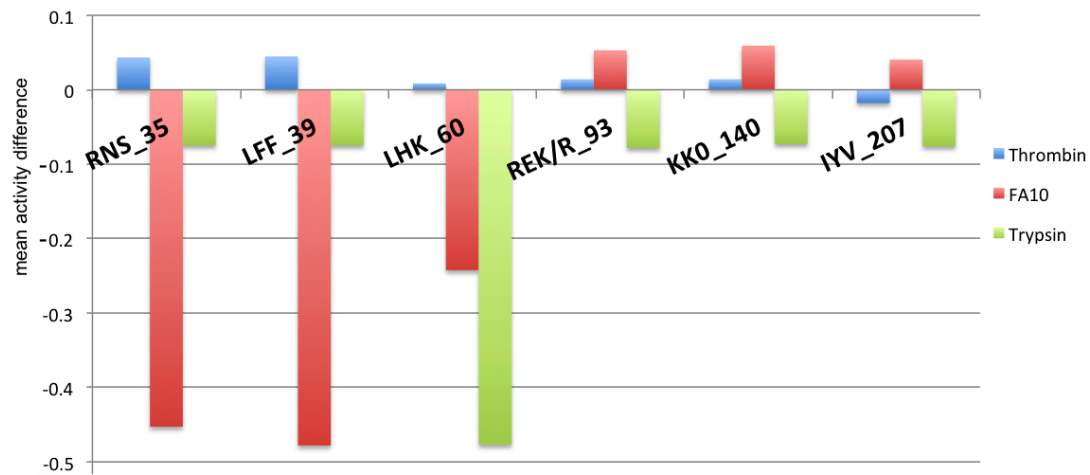

**Supplementary Figure SF 3: The protease PCM model predicted amino acids at position 35, 39, 60, 93, 140, and 207 as the key residues impacting the binding activity of compounds.** Positively charged arginine and histidine in FA10 and lysine in TRY at position 35 and 60 were predicted to decrease the binding affinity on average by 0.45, 0.25 and 0.48 log units. The amino acids arginine-35, leucine-39, arginine/lysine-93 and tyrosine-207 were predicted to be selectively affecting the binding activity against THRB, TRY and FA10 respectively.

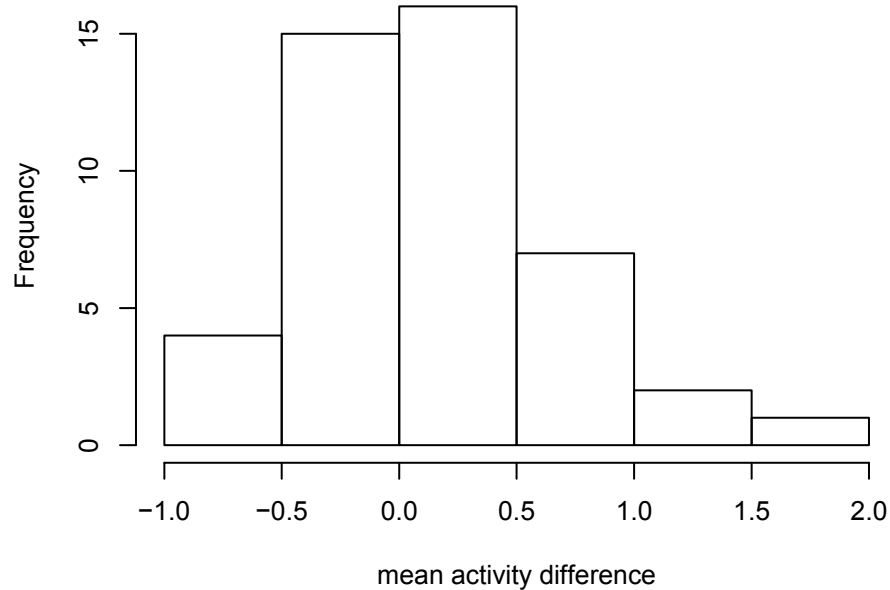

**Supplementary Figure SF 4: Distribution of mean activity difference of features employed in feature analysis.** 244 structural features of compounds were employed for feature analysis. The distribution of mean activity difference calculated for each of these 244 features is shown here. The average of mean activity difference was calculated to be 0.21 with a standard deviation of 0.54.

**Supplementary Table ST1: Number of compounds per target.** All compounds were retrieved from the following databases: ChEMBL-17 database, Directory of Useful Decoys (DUD), ZINC and Binding DB. For all compounds, IC<sub>50</sub>, Ki, AC<sub>50</sub>, EC<sub>50</sub> and Kd were kept and combined into pChEMBL units. pChEMBL values range between 3.4 and 11.7. All these protease targets used in this study lie within a similarity range of 43% to 58%, however, there are significant differences in binding pockets of these drug targets which are visible in biological space plot (Figure 2).

| Protein Target          | Paralogs                                                 | Orthologs                                    | Number of datapoints | UniProt ID                                                     | PDB ID                             |
|-------------------------|----------------------------------------------------------|----------------------------------------------|----------------------|----------------------------------------------------------------|------------------------------------|
| Thrombin (THRB)         |                                                          | THRB_Human, THRB_Mouse, THRB_Rat, THRB_Bovin | 6719                 | P00734, P19221, P18292, P00735                                 | 1ype, 2ocv, 1a0h                   |
| Coagulation Factor (FA) | FA10_Human, FA11_Human, FA9_Human, FA7_Human, FA12_Human | FA10_Rat, FA10_Dog, FA10_Rabbit              | 6957                 | P00742, Q63209, P19540, O19045, P03951, P00740, P08709, P00748 | 3kcg, 1iod, 3kl6, 4bdw, 1xx9, 1o5d |
| Trypsin (TRY)           | TRY1_Human, TRY2_Human, TRY3_Human                       | TRY1_Bovin, TRY2_Rat                         | 2679                 | P07477, P00760, P07478, P00763, P35030                         | 1fxy, 1h4w, 1amh, 1aq7, 1avw       |
| Plasminogen (PLMN)      |                                                          | PLMN_Human, PLMN_Mouse,                      | 731                  | P00747, P20918, Q01177, P06868                                 | 1ki0                               |

|                      |                                                                                                                                         |                                                  |     |                                                                                      |                                       |
|----------------------|-----------------------------------------------------------------------------------------------------------------------------------------|--------------------------------------------------|-----|--------------------------------------------------------------------------------------|---------------------------------------|
|                      |                                                                                                                                         | PLMN_Rat, PLMN_Bovin                             |     |                                                                                      |                                       |
| Cathepsin-G (CATG)   | CATG_Human, GRAB_Human                                                                                                                  | CATG_Mouse, MCPT9_Mouse                          | 201 | P08311, P28293, P10144, O35164                                                       | 1kyn                                  |
| Chymotrypsin (CTRL)  | CTRL_Human, CTRB1_Human                                                                                                                 | CTRA1_Bovin, CTRB_Bovin                          | 303 | P40313, P17538, P00766, P00767                                                       | 3gch, 1cbw                            |
| Tryptase (TRYB)      | TRYB1_Human,<br>PRSS31_Human                                                                                                            | TRYB_Rat, TRYB_Mouse,<br>TRYB_Dog                | 172 | Q15661, P27435, Q02844, P15944,<br>Q9NRR2                                            | 1lto                                  |
| Elastase (CEL)       |                                                                                                                                         | CELA1_Human, CEL2A_Rat,<br>CEL2A_Pig, CELA1_Pig  | 131 | Q9UNI1, P00774, P08419, P00772                                                       | 1okx, 1bru                            |
| Urokinase (UROK)     |                                                                                                                                         | UROK_Human,<br>UROK_Mouse, UROK_Rat,<br>UROK_Pig | 936 | P00749, P06869, P29598, P04185                                                       | 1c5w, 3laq                            |
| Kallikrein (KLK)     | KLK1_Human, KLK2_Human,<br>KLK3_Human, KLK4_Human,<br>KLK5_Human, KLK6_Human,<br>KLK7_Human, KLK8_Human,<br>KLKB1_Human,<br>PRTN3_Human |                                                  | 101 | P06870, P20151, P07288, Q9Y5K2,<br>Q9Y337, Q92876, P49862, O60259,<br>P03952, P24158 | 2psx, 3vfe, 1spj,<br>3bsq, 4k1e, 2zch |
| Transmembrane Serine | TMPS2_Human,                                                                                                                            |                                                  | 828 | O15393, Q9NRS4, Q8IU80, P00750,                                                      | 1dfp, 1fuj, 3dfj,                     |

|                      |                                                                                                                                           |  |     |                                                           |                     |
|----------------------|-------------------------------------------------------------------------------------------------------------------------------------------|--|-----|-----------------------------------------------------------|---------------------|
| Protease (TMPS)      | TMPS4_Human,<br>TMPS6_Human, TPA_Human,<br>TM11D_Human, PROC_Human,<br>ST14_Human, HEPS_Human,<br>PRSS8_Human,<br>TRYG1_Human, CFAD_Human |  |     | O60235, P04070, Q9Y5Y6, P05981,<br>Q16651, Q9NRR2, P00746 | 1o5e, 3f6u,<br>2gv6 |
| Chymase (CMA)        | CMA1_Human                                                                                                                                |  | 366 | P23946                                                    | 1pjp                |
| Complement C1r (C1R) | C1R_Human                                                                                                                                 |  | 89  | P00736                                                    | 1apq                |

## Supplementary Table ST2: Aligned binding site amino acids of 67 targets

employed in the study.

| Targets            |   | 35 | 39 | 40 | 41 |
|--------------------|---|----|----|----|----|
| Q15661_TRYB1_HUMAN | V | F  | C  | G  |    |
| P15944_TRYT_DOG    | L | I  | C  | G  |    |
| P27435_TRYB1_RAT   | V | F  | C  | G  |    |
| Q02844_TRYB1_MOUSE | A | F  | C  | G  |    |
| Q9NRR2_TRYG1_HUMAN | L | V  | C  | G  |    |
| Q8IU80_TMPS6_HUMAN | V | I  | C  | G  |    |
| Q9Y5Y6_ST14_HUMAN  | A | I  | C  | G  |    |
| O60235_TM11D_HUMAN | L | H  | C  | G  |    |
| O15393_TMPS2_HUMAN | V | V  | C  | G  |    |

All the alignment dependent descriptors were calculated based on this information.

The position of each amino acid is given in the headers of the file. A separate excel sheet has also been added as supplementary information.

## Supplementary Table ST3. Leave One Target Out validation of 67 Serine

**Protease Targets.**  $R^2$  and RMSE of each target was calculated individually and averaged together as mean  $R^2$  and mean RMSE in the main text for each sub-family.

| Sr. No. | Target            | $R^2_{\text{test}}$ | RMSE <sub>test</sub> (log units) | Target Sub family |
|---------|-------------------|---------------------|----------------------------------|-------------------|
| 1.      | O19045_FA10_RABIT | 0.51                | 2.37                             | FA10              |
| 2.      | P00740_FA9_HUMAN  | 0.22                | 1.03                             |                   |
| 3.      | P00742_FA10_HUMAN | 0.13                | 1.67                             |                   |
| 4.      | P00743_FA10_BOVIN | 0.53                | 1.83                             |                   |
| 5.      | P00748_FA12_HUMAN | 0.38                | 0.81                             |                   |

|     |                    |      |      |      |
|-----|--------------------|------|------|------|
| 6.  | P03951_FA11_HUMAN  | 0.34 | 1.03 |      |
| 7.  | P08709_FA7_HUMAN   | 0.02 | 1.43 |      |
| 8.  | Q63207_FA10_RAT    | 0.70 | 0.93 |      |
| 9.  | O77669_FA10_DOG    | 0.01 | 1    |      |
| 10. | P00734_THRB_HUMAN  | 0.08 | 1.68 | THRB |
| 11. | P00735_THRB_BOVIN  | 0.23 | 1.27 |      |
| 12. | P18292_THRB_RAT    | 0.63 | 1.25 |      |
| 13. | P19221_THRB_MOUSE  | 0.90 | 0.60 |      |
| 14. | P00749_UROK_HUMAN  | 0.20 | 1.05 | UROK |
| 15. | P04185_UROK_PIG    | 0.94 | 0.42 |      |
| 16. | P06869_UROK_MOUSE  | 0.96 | 1.41 |      |
| 17. | P29598_UROK_RAT    | 0.99 | 0.82 |      |
| 18. | O60259_KLK8_HUMAN  | 0.40 | 0.18 | KLK  |
| 19. | P03952_KLKB1_HUMAN | 0.49 | 1.05 |      |
| 20. | P06870_KLK1_HUMAN  | 0.34 | 1.01 |      |

|     |                    |       |      |      |
|-----|--------------------|-------|------|------|
| 21. | P07288_KLK3_HUMAN  | 0.02  | 1.92 |      |
| 22. | P20151_KLK2_HUMAN  | 0.99  | 0.90 |      |
| 23. | P24158_PRTN3_HUMAN | 0.71  | 0.36 |      |
| 24. | P49862_KLK7_HUMAN  | 0.30  | 0.73 |      |
| 25. | Q92876_KLK6_HUMAN  | 0.007 | 0.37 |      |
| 26. | Q9Y337_KLK5_HUMAN  | 0.20  | 1.04 |      |
| 27. | Q9Y5K2_KLK4_HUMAN  | 0.50  | 0.27 |      |
| 28. | P00760_TRY1_BOVIN  | 0.46  | 1.01 | TRY  |
| 29. | P00761_TRYP_PIG    | 0.58  | 0.75 |      |
| 30. | P00763_TRY2_RAT    | 0.33  | 0.53 |      |
| 31. | P07477_TRY1_HUMAN  | 0.29  | 0.89 |      |
| 32. | P07478_TRY2_HUMAN  | 0.39  | 1.09 |      |
| 33. | P35030_TRY3_HUMAN  | 0.80  | 1.45 |      |
| 34. | Q29463_TRY2_BOVIN  | 0.40  | 0.72 |      |
| 35. | P00747_PLMN_HUMAN  | 0.34  | 0.94 | PLMN |

|     |                    |      |      |      |
|-----|--------------------|------|------|------|
|     |                    |      |      |      |
| 36. | P06868_PLMN_BOVIN  | 0.69 | 0.30 |      |
| 37. | P20918_PLMN_MOUSE  | 0.98 | 0.57 |      |
| 38. | Q01177_PLMN_RAT    | 0.40 | 0.78 |      |
| 39. | P15944_TRYT_DOG    | 0.31 | 0.99 | TRYB |
| 40. | P27435_TRYB1_RAT   | 0.09 | 0.87 |      |
| 41. | Q02844_TRYB1_MOUSE | 0.22 | 1.26 |      |
| 42. | Q15661_TRYB1_HUMAN | 0.13 | 1.27 |      |
| 43. | Q9NRR2_TRYG1_HUMAN | 0.23 | 2.14 | TMPS |
| 44. | O15393_TMPS2_HUMAN | 0.93 | 0.36 |      |
| 45. | O60235_TM11D_HUMAN | 0.2  | 0.7  |      |
| 46. | P00750_TPA_HUMAN   | 0.05 | 1.09 |      |
| 47. | P04070_PROC_HUMAN  | 0.40 | 1.24 |      |
| 48. | Q16651_PRSS8_HUMAN | 0.40 | 1.83 |      |
| 49. | Q8IU80_TMPS6_HUMAN | 0.80 | 0.91 |      |

|     |                    |      |      |      |
|-----|--------------------|------|------|------|
| 50. | Q9NRS4_TMPS4_HUMAN | 0.20 | 0.56 |      |
| 51. | Q9Y5Y6_ST14_HUMAN  | 0.20 | 1.5  |      |
| 52. | P00746_CFAD_HUMAN  | 0.09 | 2.34 |      |
| 53. | P05981_HEPS_HUMAN  | 0.1  | 1.54 |      |
| 54. | P00772_CELA1_PIG   | 0.56 | 1.04 | CELA |
| 55. | P00774_CEL2A_RAT   | 0.97 | 0.60 |      |
| 56. | P08419_CEL2A_PIG   | 0.01 | 1.30 |      |
| 57. | Q9UNI1_CELA1_HUMAN | 0.13 | 1.30 |      |
| 58. | P00766_CTRA_BOVIN  | 0.46 | 0.99 | CTRL |
| 59. | P00767_CTRB_BOVIN  | 0.30 | 1.30 |      |
| 60. | P17538_CTRB1_HUMAN | 0.31 | 0.99 |      |
| 61. | P40313_CTRL_HUMAN  | 0.31 | 2.2  |      |
| 62. | O35164_MCPT9_MOUSE | 0.99 | 0.49 | CATG |
| 63. | P00736_C1R_HUMAN   | 0.10 | 0.90 |      |
| 64. | P08311_CATG_HUMAN  | 0.40 | 1.1  |      |

|     |                   |     |       |  |
|-----|-------------------|-----|-------|--|
|     |                   |     |       |  |
| 65. | P10144_GRAB_HUMAN | 0   | 0.001 |  |
| 66. | P23946_CMA1_HUMAN | 0.2 | 1.3   |  |
| 67. | P28293_CATG_MOUSE | 0.1 | 0.87  |  |

The statistical correlations and error were defined as following:

$$R_{test}^2 = 1 - \frac{\sum_{j=1}^N (y_j - \tilde{y}_j)^2}{\sum_{j=1}^N (y_j - \bar{y}_{test})^2}$$

$$RMSE_{test} = \sqrt{\sum_{j=1}^N (y_j - \tilde{y}_j)^2 / N}$$

Where  $N, y_j, \tilde{y}_j, \bar{y}_{test}$  represents the size of training set, the observed, the predicted and the mean of the response variables comprising the test set.<sup>1,2</sup>

### Supplementary References

1. A. Golbraikh and A. Tropsha, *J. Mol. Graph. Model.*, 2002, **20**, 269–276.
2. A. Tropsha, P. Gramatica, and V. Gombar, *QSAR Comb. Sci.*, 2003, **22**, 69–77.
